# Supplementary material
Source: Research Square preprint supplement (doi:10.21203/rs.3.rs-9382567/v1)
Supplement: Supplementary file 1 [file a42c667d0c754e587dd69785.docx]

**Appendix A.** Representative Measurement Structure

The detailed measurement structure of the constructs is presented in Figure A1. Each construct is represented by a set of observed indicators derived from the survey instrument. The displayed item weights are based on exploratory first-component analysis and are included for illustrative purposes only.


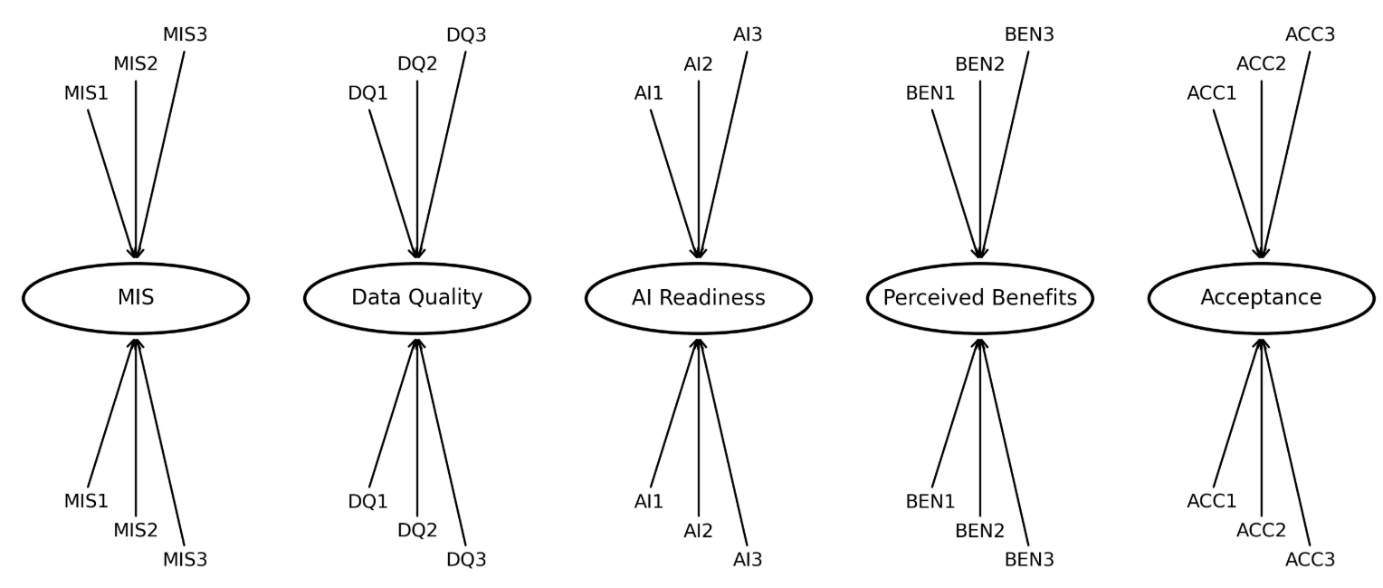


**Figure A1.** Measurement model (representative indicators).

The figure presents representative observed indicators for each construct based on exploratory first-component item weights. These values are used for visualization purposes only and should not be interpreted as confirmatory factor loadings.
